# Supplementary material
Source: Springer Nature journal article supplement (https://www.springermedizin.de/resource/supplementary/12967_2013_1651_MOESM3_ESM.pdf/9574552)

A. Fat only

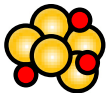

B. Fat + ADRC ( $\times 1$ )

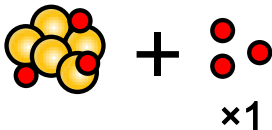

C. Fat + ADRC ( $\times 5$ )

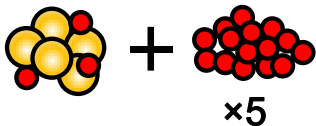

D. Fat + ADRC ( $\times 10$ )

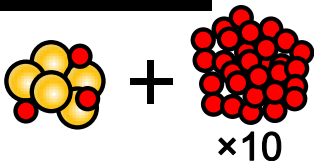

Supplement: MOESM3 [file 9574552]
